# Supplementary material
Source: publisher figshare collection journal article supplement (https://acs.figshare.com/ndownloader/files/4768057)
Supplement: Supplementary file 1 [file 4768057]

# Multifunctional, Catalytic Nanowire Membranes and the Membrane-Based 3D Devices

*Wenjun Dong, Andrew Cogbill, Tierui Zhang, Samrat Ghosh, Z. Ryan Tian\**

Chemistry and Biochemistry, University of Arkansas, Fayetteville, AR 72701, USA

## Supporting information:

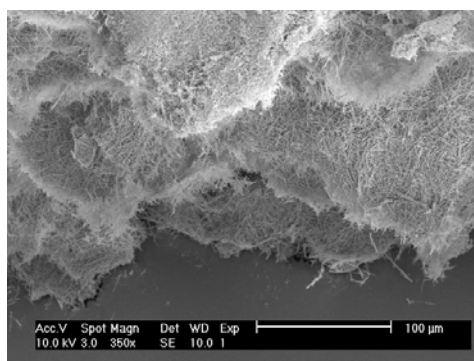

**S1.** A low-resolution FESEM photograph indicating the multi-deck texture calcined at 700 °C.

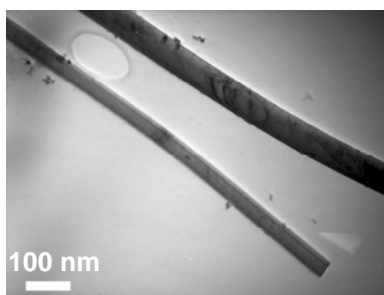

**S2.** A TEM picture presenting the single nanowire diameter for the sample calcined at 700 °C.

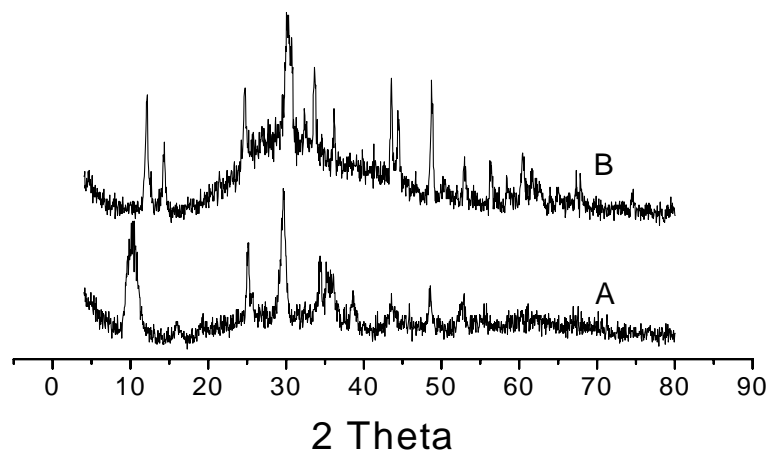

**S3.** X-ray powder diffraction pattern of titanate nanofiber. (a) as prepared. (b) calcined at  $700^\circ\text{C}$  for 3 h.
